# Supplementary material for: Enhancement of replacement lithography by combination of photocleavable groups with ultrashort thiolates
Source: Royal Society of Chemistry journal article supplement (doi:10.1039/d3lf00248a), 2024-01-01
Supplement: d3lf00248a1.pdf [file d3lf00248a1.pdf]

# Enhancement of Replacement Lithography by Combination of Photocleavable Groups with Ultrashort Thiolates

*Christian Fischer, Florian Born, Andreas Terfort\**

*Institute of Inorganic and Analytical Chemistry, Goethe University Frankfurt, Max-von-Laue-Straße  
7, 60438 Frankfurt am Main, Germany.*

**KEYWORDS** ONB-group, UV-Irradiation, SAM Exchange, Infrared-Reflection Absorption  
Spectroscopy.

## Supporting Information

### Table of contents

|                                                                                        |                  |
|----------------------------------------------------------------------------------------|------------------|
| <b>1. Synthetic procedures for Compounds 1 to 10.....</b>                              | <b>S2 – S10</b>  |
| <b>2. <sup>1</sup>H and <sup>13</sup>C NMR Spectra of Compounds 1, 2, 3 and 9.....</b> | <b>S11 – S16</b> |
| <b>3. Full IR Characterization of Compounds 1, 2 and 3.....</b>                        | <b>S17 – S22</b> |
| <b>4. Wettability data.....</b>                                                        | <b>S23</b>       |
| <b>5. LED-Datasheet.....</b>                                                           | <b>S24</b>       |
| <b>6. References.....</b>                                                              | <b>S24</b>       |

# 1. Experimental Procedures

## 1.1 Materials

All solvents and chemicals were purchased from commercial suppliers and used as received unless otherwise state. Ethyl acetate (99.5%), DCM (99.9%), diethylether (99.8), acetic acid (99.8%), ethanol (p.a. 99.8%), NaBH<sub>4</sub> (99%) and vanillin (reagentplus grade) were purchased from Sigma-Aldrich, THF (ACS reagent grade), acetonitrile (HPLC grade) and K<sub>2</sub>S<sub>2</sub>O<sub>3</sub> (GPR reactapur grade) from VWR, K<sub>3</sub>Fe(CN)<sub>6</sub> (99%), Na<sub>2</sub>SO<sub>4</sub> (99%) and 3,4-dihydroxybenzaldehyde (98%) from Roth, thioglycolic acid (96%) from TCI, KOH (99.5%) from Bernd Kraft, K<sub>4</sub>Fe(CN)<sub>6</sub> (extra pure grade) from Merck, NaHCO<sub>3</sub> (extra pure grade) and K<sub>2</sub>CO<sub>3</sub> (extra pure grade) from Grüssing, DMF (99.5%) and HNO<sub>3</sub> (70%, reagent grade) from Fisher Scientific, DIAD (98%) from Carbolution and 1-bromohexane (99+%) from Acros. Hexane was received in technical grade and distilled prior to use in chromatography. Absolute (abs.) THF was obtained by heating THF over sodium metal in a nitrogen atmosphere with benzophenone as indicator and freshly distilled before use and kept under nitrogen over 3A molar sieve.

## 1.2 Synthesis of *O*-hexylvanillin **4**<sup>1</sup>

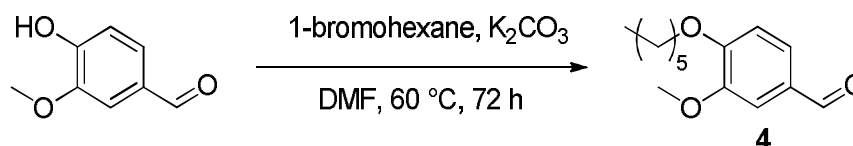

To solution of vanillin (10.00 g, 65.73 mmol) in DMF (50 mL) was added K<sub>2</sub>CO<sub>3</sub> (14.53 g, 105.2 mmol) and 1-bromohexane (11.0 mL, 78.9 mmol) before heating at 60 °C for 72 h. The mixture was poured into ice water (100 mL), extracted with diethylether three times, before washing the combined organic layers with a saturated NaHCO<sub>3</sub> solution and brine. After drying over Na<sub>2</sub>SO<sub>4</sub>, the solvent was removed in vacuum and the obtained crystalline crude

product washed with a small amount of *n*-hexane. The product was isolated as colorless crystals in 74% yield (11.74 g, 48.64 mmol).

**<sup>1</sup>H-NMR** (250 MHz, CDCl<sub>3</sub>):  $\delta$  = 9.84 (s, 1H, H-1), 7.40 – 7.45 (m, 2H, H-2, H-3) 6.96 (d, <sup>3</sup>*J*<sub>H-H</sub> = 7.5 Hz, 1H, H-4) 4.10 (t, <sup>3</sup>*J*<sub>H-H</sub> = 7.5 Hz, 2H, H-6), 3.93 (s, 3H, H-5), 1.88 (quin, <sup>3</sup>*J*<sub>H-H</sub> = 7.5 Hz, 2H, H-7), 1.40 – 1.54 (m, 2H, H-8), 1.30 – 1.39 (m, 4H, H-9 and H-10), 0.85 – 0.95 (m, 3H, H-11).

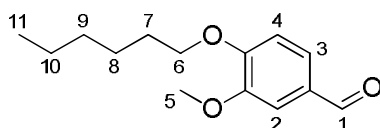

### 1.3 Synthesis of 3,4-Di(hexyloxy)benzaldehyde **5**<sup>2</sup>

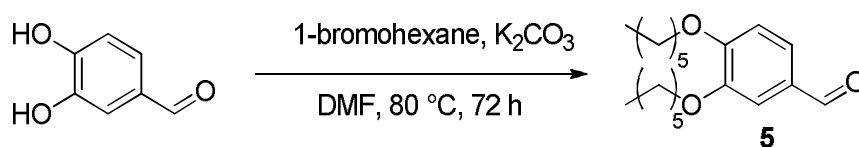

Compound **5** was synthesized as described in literature<sup>2</sup>, using 3,4-dihydroxybenzaldehyde (5.00 g, 74.2 mmol), K<sub>2</sub>CO<sub>3</sub> (15.01 g, 108.6 mmol) and 1-bromohexane (11.1 mL, 79.6 mmol) at slightly higher temperatures of 80 °C for 24 hours. The product was obtained after washing with *n*-hexane as an off-white solid in 97% yield (10.76 g, 7.020 mmol).

**<sup>1</sup>H-NMR** (250 MHz, CDCl<sub>3</sub>):  $\delta$  = 9.83 (s, 1H, H-1), 7.41 (m, 2H, H-2 and H-4), 6.95 (d, <sup>3</sup>*J*<sub>H-H</sub> = 7.5 Hz, 1H, H-3), 4.06 (q, <sup>3</sup>*J*<sub>H-H</sub> = 7.5 Hz, 4H, H-5 and H-11), 1.76 – 1.92 (m, 4H, H-6 and H-12), 1.42 – 1.54 (m, 4H, H-7 und H-13), 1.28 – 1.40 (m, 8H, H-8, H-9, H-14 and H-15), 0.85 – 0.96 (m, 6H, H-10 and H-16).

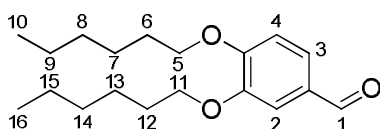

## 1.4 Synthesis of 4-Hexyloxy-5-methoxy-2-nitrobenzaldehyde **6**

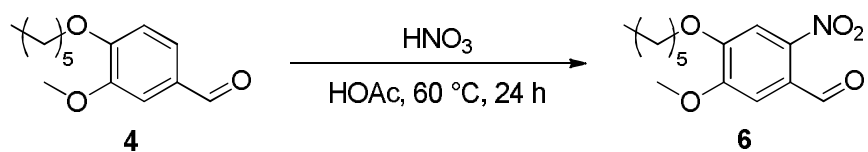

Compound **4** (11.47 g, 48.54 mmol) was dissolved in acetic acid (100 mL), 65%  $\text{HNO}_3$  (17.0 mL, 244.0 mmol) was added, and the mixture heated for 24 h at  $60\text{ }^\circ\text{C}$ . After addition of water (50 mL) and extraction with DCM, the organic phase was washed with saturated  $\text{NaHCO}_3$  solution and brine, before drying over  $\text{Na}_2\text{SO}_4$ . The solvent was removed in vacuum to yield a bright yellow solid (12.01 g, 75% purity, equivalent to 9.00 g of pure **6**, 32.0 mmol, 66%), which was used without further purification in the next reaction step. The impurity is the corresponding 4-hexyloxy-3-methoxybenzoic acid formed by oxidation under the reaction conditions.

$^1\text{H-NMR}$  (250 MHz,  $\text{CDCl}_3$ ):  $\delta = 10.44$  (s, 1H, H-1), 7.59 (s, 1H, H-3), 7.41 (s, 1H, H-2), 4.15 (t,  $^3J_{\text{H-H}} = 7.5$  Hz, 2H, H-5), 4.01 (s, 3H, H-4), 1.81 – 1.97 (m, 2H, H-6), 1.41 – 1.59 (m, 2H, H-7), 1.26 – 1.41 (m, 4H, H-8 and H-9), 0.84 – 0.98 (m, 3H, H-10); (compare ref.<sup>3</sup>).

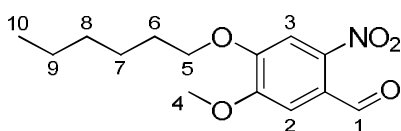

## 1.5 Synthesis of 4,5-Di(hexyloxy)-2-nitrobenzaldehyde **7**

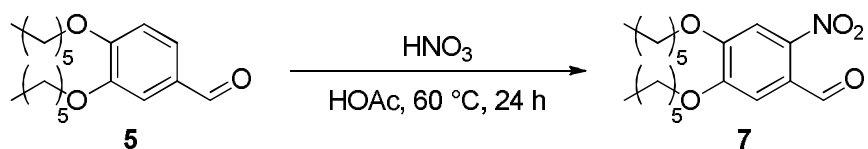

Compound **7** was prepared similar to compound **6** from **5** (12.85 g, 41.93 mmol) and 65%  $\text{HNO}_3$  (14.6 mL, 210 mmol) in acetic acid (120 mL). The crude product was obtained as a yellow solid (12.51 g, 80% purity, equivalent to 10.00 g of pure **7**, 28.5 mmol, 68%) and used without further purification. Like in chapter 1.4 the impurity is the oxidized species 3,4-Dihexyloxybenzoic acid.

**<sup>1</sup>H-NMR** (300 MHz, CDCl<sub>3</sub>):  $\delta$  = 10.43 (s, 1H, H-1), 7.57 (s, 1H, H-3), 7.37 (s, 1H, H-2), 4.09 - 4.17 (m, 4H, H-4 and H-10), 1.79 – 1.94 (m, 4H, H-5 and H-11), 1.42 – 1.56 (m, 4H, H-6 and H-12), 1.27 – 1.42 (m, 8H, H-7, H-8, H-13 and H-14), 0.85 – 0.96 (m, 6H, H-9 and H-15).

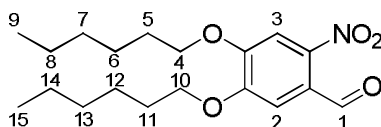

### 1.6 Synthesis of 4-Hexyloxy-5-methoxy-2-nitrobenzylalcohol **8**<sup>3</sup>

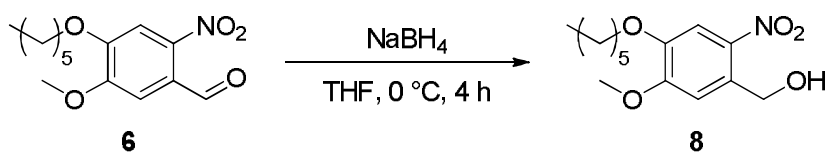

The crude compound **6** (8.00 g, equivalent to 6.00 g of pure **6**, 21.33 mmol) was dissolved in abs. THF (200 mL), cooled to 0 °C in an ice bath, and treated with NaBH<sub>4</sub> (2.15 g, 56.9 mmol). After four hours the suspension was poured into water (200 mL) and extracted three times with EE, before drying the combined organic phase over Na<sub>2</sub>SO<sub>4</sub> and removing the solvent. The crude product was recrystallized from *n*-hexane to yield a yellow solid in 85% (5.13 g, 18.2 mmol, 56% over both steps).

**<sup>1</sup>H-NMR** (400 MHz, CDCl<sub>3</sub>):  $\delta$  = 7.70 (s, 1H, H-5), 7.14 (s, 1H, H-8), 4.96 (d, <sup>3</sup>*J*<sub>H-H</sub> = 5.7 Hz, 2H, H-2), 4.07 (t, <sup>3</sup>*J*<sub>H-H</sub> = 6.8 Hz, 2H, H-9), 3.99 (s, 3H, H-15), 2.60 (t, <sup>3</sup>*J*<sub>H-H</sub> = 6.5 Hz, 1H, H-1) 1.87 (quin, <sup>3</sup>*J*<sub>H-H</sub> = 6.9 Hz, 2H, H-10), 1.43 – 1.52 (m, 2H, H-11), 1.31 – 1.39 (m, 4H, H-12 und H-13), 0.88 – 0.95 (m, 3H, H-14); (compare ref.<sup>3</sup>).

**<sup>13</sup>C-NMR** (126 MHz, CDCl<sub>3</sub>):  $\delta$  = 154.4 (C-7), 147.7 (C-6), 140.0 (C-4), 132.1 (C-3), 111.4 (C-8), 109.5 (C-5), 69.7 (C-9), 63.1 (C-2), 56.6 (C-15), 31.7 (C-12), 29.0 (C-10), 25.7 (C-11), 22.7 (C-13), 14.1 (C-14).

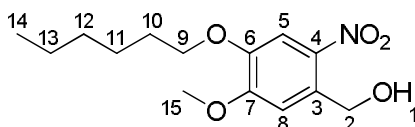

**MS** [m/z]: calc.: 306.13 [M + Na]<sup>+</sup>, found: 306.00 [M + Na]<sup>+</sup>.

### 1.7 Synthesis of 4,5-Di(hexyloxy)-2-nitrobenzylalcohol **9**

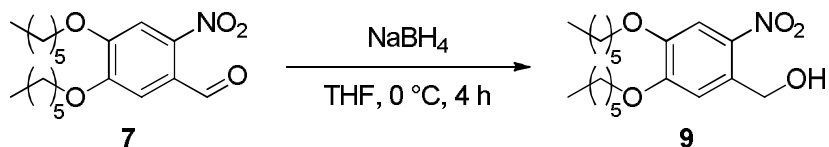

Compound **9** was synthesized similarly to compound **8**, using **7** (8.00 g, equivalent to 6.40 g of pure **7**, 18.2 mmol) and NaBH<sub>4</sub> (1.75 g, 45.5 mmol) in abs. THF (180 mL), yielding an oily crude product, which was further purified by column chromatography (silica, *n*-hexane/EE gradient from 1:10 to 1:1). The resulting light-yellow solid was obtained in 82% yield (5.28 g, 15.0 mmol, mp. 62 °C, 56% over both steps).

**<sup>1</sup>H-NMR** (500 MHz, CDCl<sub>3</sub>): δ = 7.67 (s, 1H, H-5), 7.11 (s, 1H, H-8), 4.92 (s, 2H, H-2), 4.11 (t, <sup>3</sup>J<sub>H-H</sub> = 6.3 Hz, 2H, H-15), 4.04 (t, <sup>3</sup>J<sub>H-H</sub> = 6.6 Hz, 2H, H-9), 2.57 (s, 1H, OH), 1.84 (h, <sup>3</sup>J<sub>H-H</sub> = 7.0 Hz, 4H, H-10, H-16), 1.53 – 1.43 (m, 4H, H-11, H-17), 1.39 – 1.29 (m, 8H, H-12, H-13, H-18, H-19), 0.90 (t, <sup>3</sup>J<sub>H-H</sub> = 6.6 Hz, 6H, H-14, H-20).

**<sup>13</sup>C-NMR** (126 MHz, CDCl<sub>3</sub>): δ = 154.3 (C-7), 147.9 (C-6), 139.7 (C-4), 132.2 (C-3), 112.4 (C-8), 110.0 (C-5), 69.7 (C-9, C-15), 63.1 (C-2), 31.6 (C-12, C-18), 29.0 (C-10, C-16), 25.7 (C-11, C-17), 22.7 (C-13, C-19), 14.1 (C-14, C-20).

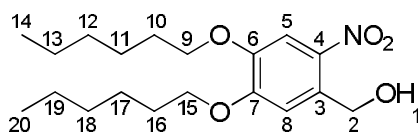

**MS** [m/z]: calc.: 376.20 [M + Na]<sup>+</sup>, found: 376.08 [M + Na]<sup>+</sup>.

### 1.8 Synthesis of 4-Hexyloxy-3-methoxy-benzylalcohol **10**

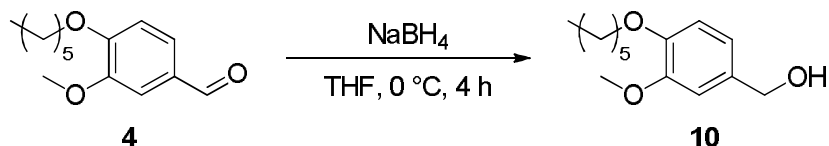

Compound 4 (3.00 g, 12.7 mmol) was reacted with NaBH<sub>4</sub> (0.96 g, 25.4 mmol) in abs. THF (100 mL). After work-up the crude product was further purified by column chromatography (silica, *n*-hexane/EE gradient from 1:10 to 3:2) to yield a colorless solid in 83% yield (2.50 g, 10.5 mmol).

<sup>1</sup>H-NMR (400 MHz, CDCl<sub>3</sub>):  $\delta$  = 6.94 – 6.92 (m, 1H, H-3), 6.89 – 6.83 (m, 2H, H-5, H-4), 4.62 (s, 2H, H-2), 4.01 (t, <sup>3</sup>*J*<sub>H-H</sub> = 6.9 Hz, 2H, H-6), 3.88 (s, 3H, H-12), 1.89 – 1.78 (m, 2H, H-7), 1.51 – 1.40 (m, 2H, H-8), 1.42 – 1.28 (m, 4H, H-9, H-10), 0.90 (t, <sup>3</sup>*J*<sub>H-H</sub> = 7.0 Hz, 2H, H-11).

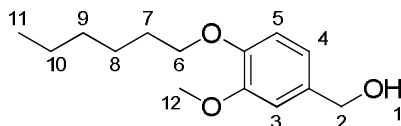

## 1.9 Synthesis of Bis-(4-hexyloxy-5-methoxy-2-nitrobenzyl)-dithioglycolate **1**

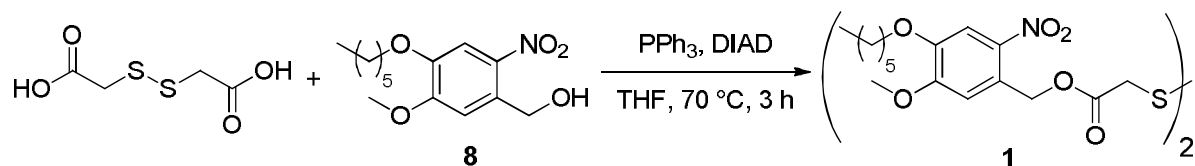

To PPh<sub>3</sub> (1.32 g, 5.01 mmol) dissolved in THF (12 mL) was slowly added DIAD (0.92 mL, 5.01 mmol) at 0 °C. After warming to room temperature, compound **8** (1.42 g, 5.01 mmol) and dithiodiglycolic acid (0.44 g, 2.39 mmol) were added, before heating to 70 °C for three hours. After addition of water, the mixture was extracted three times with EE (20 mL each), the combined organic phases dried over Na<sub>2</sub>SO<sub>4</sub>, and the solvent removed in vacuum. The crude product was purified by column chromatography (silica, DCM/EE gradient from 99:1 to 4:1) to yield a light yellow solid (0.95 g, 1.33 mmol, 56%, mp. 73 °C).

**<sup>1</sup>H-NMR** (500 MHz, CDCl<sub>3</sub>)  $\delta$  = 7.69 (s, 2H, H-6), 7.05 (s, 2H, H-9), 5.55 (s, 4H, H-3), 4.06 (t, <sup>3</sup>J<sub>H-H</sub> = 6.8 Hz, 4H, H-10), 3.97 (s, 6H, H-16), 3.67 (s, 4H, H-1), 1.86 (p, <sup>3</sup>J<sub>H-H</sub> = 6.9 Hz, 4H, H-11), 1.51 – 1.42 (m, 4H, H-12), 1.40 – 1.29 (m, 8H, H-13 and H-14), 0.90 (t, <sup>3</sup>J<sub>H-H</sub> = 6.8 Hz, 6H, H-15).

**<sup>13</sup>C-NMR** (126 MHz, CDCl<sub>3</sub>)  $\delta$  = 168.6 (C-2), 154.0 (C-8), 148.0 (C-7), 139.8 (C-5), 126.0 (C-4), 110.6 (C-9), 109.3 (C-6), 69.6 (C-10), 64.3 (C-3), 56.6 (C-16), 41.2 (C-1), 31.5 (C-13), 28.8 (C-11), 25.6 (C-12), 22.6 (C-14), 14.0 (C-15).

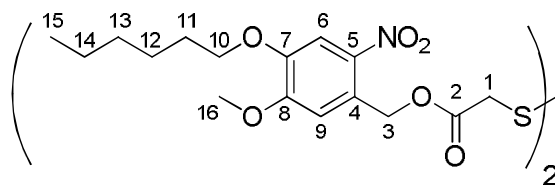

**MS** [m/z]: calc.: 713.83 [M + H]<sup>+</sup>, found: 714.48 [M + D]<sup>+</sup>.

**UV/Vis** = 346 nm (6425 L/mol), 300 nm (4942 L/mol).



## 1.10 Synthesis of Bis-(4,5-di(hexyloxy)-2-nitrobenzyl)-dithioglycolate **2**

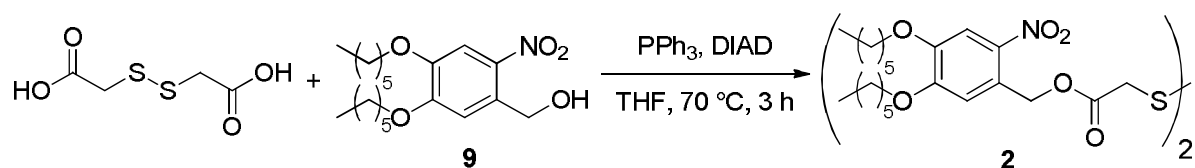

Compound **2** was obtained through the same protocol as compound **1**, by reacting dithiodiglycolic acid (0.25 g, 1.35 mmol) with  $\text{PPh}_3$  (0.74 g, 2.83 mmol), DIAD (0.52 mL, 2.83 mmol) and compound **9** (1.00 g, 2.83 mmol) in THF (14 mL). The obtained crude product was further purified by column chromatography (silica, DCM/EE 99:1), to yield a light-yellow solid in 53% (0.61 g, 0.72 mmol, mp. 106 °C) as the final product.

**$^1\text{H-NMR}$**  (500 MHz,  $\text{CDCl}_3$ )  $\delta$  = 7.69 (s, 2H, H-6), 7.02 (s, 2H, H-9), 5.55 (s, 4H, H-3), 4.10 (t,  $^3J_{\text{H-H}} = 6.5$  Hz, 4H, H-16), 4.04 (t,  $^3J_{\text{H-H}} = 6.6$  Hz, 4H, H-10), 3.67 (s, 4H, H-1), 1.84 (p,  $^3J_{\text{H-H}} = 6.8$  Hz, 8H, H-11, H-17), 1.53 – 1.43 (m, 8H, H-12, H-18), 1.40 – 1.27 (m, 16H, H-13, H-14, H-19, H-20), 0.97 – 0.85 (m, 12H, H-15, H-21).

**$^{13}\text{C-NMR}$**  (126 MHz,  $\text{CDCl}_3$ ):  $\delta$  = 168.6 (C-2), 153.9 (C-8), 148.3 (C-7), 139.6 (C-5), 126.0 (C-4), 111.7 (C-9), 109.8 (C-6), 69.6 (C-10, C-16), 64.4 (C-3), 41.3 (C-1), 31.5 (C-13, C-19), 28.9 (C-11, C-17), 25.7 (C-12, C-18), 22.6 (C-14, C-20), 14.0 (C-15, C-21).

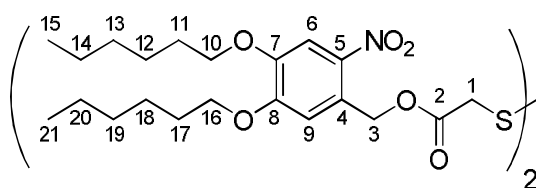

**MS** [m/z]: calc.: 854.10  $[\text{M} + \text{H}]^+$ , found: 854.92  $[\text{M} + \text{D}]^+$ .

### 1.11 Synthesis of Bis-(4-hexyloxy-3-methoxy-benzyl)-dithioglycolate **3**

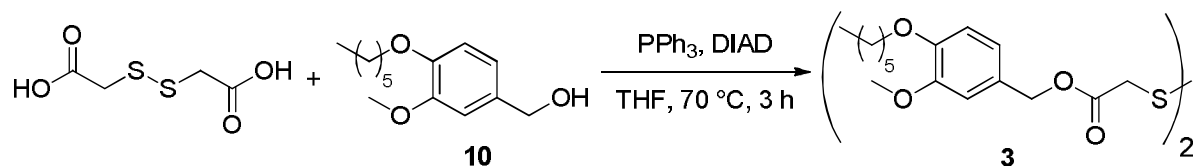

Similar to compound **1** (1.9), dithiodiglycolic acid (0.73 g, 4.0 mmol) was reacted with PPh<sub>3</sub> (2.22 g, 8.46 mmol), DIAD (1.7 mL, 8.5 mmol) and compound **10** (2.00 g, 8.46 mmol) in THF (35 mL). After aqueous work-up, the crude product was further purified by column chromatography (silica, *n*-hexane/EE gradient from 10:1 to 3:2) to give the final product as an off-white solid in 53% yield (1.27 g, 2.04 mmol).

**<sup>1</sup>H-NMR** (500 MHz, CDCl<sub>3</sub>):  $\delta = 6.94 - 6.87$  (m, 4H, H-9, H-5),  $6.86 - 6.80$  (m, 2H, H-6),  $5.09$  (s, 4H, H-3),  $3.99$  (t,  $^3J_{\text{H-H}} = 6.9$  Hz, 4H, H-19),  $3.86$  (s, 6H, H-16),  $3.56$  (s, 4H, H-1),  $1.82$  (p,  $^3J_{\text{H-H}} = 7.0$  Hz, 4H, H-11),  $1.44$  (p,  $^3J_{\text{H-H}} = 7.2$  Hz, 4H, H-12),  $1.36 - 1.29$  (m, 8H, H-13, H-14),  $0.89$  (t,  $^3J_{\text{H-H}} = 6.6$  Hz, 6H, H-15).

**<sup>13</sup>C-NMR** (126 MHz, CDCl<sub>3</sub>):  $\delta = 169.3$  (C-2),  $149.5$  (C-8),  $149.0$  (C-7),  $127.7$  (C-4),  $121.6$  (C-5),  $112.7$  (C-6),  $112.4$  (C-9),  $69.2$  (C-10),  $67.6$  (C-3),  $56.1$  (C-16),  $41.5$  (C-1),  $31.7$  (C-13),  $29.2$  (C-11),  $25.7$  (C-12),  $22.7$  (C-14),  $14.1$  (C-15).

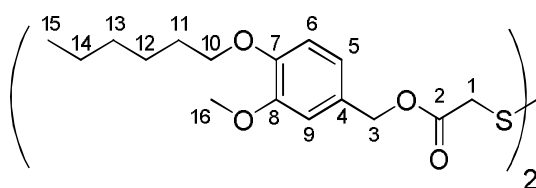

**MS** [m/z]: calc.: 623.21 [M + H]<sup>+</sup>, found: 645.10 [M + Na]<sup>+</sup>.

**UV/Vis** = 280 nm (3933 L/mol).

## 2. NMR Data

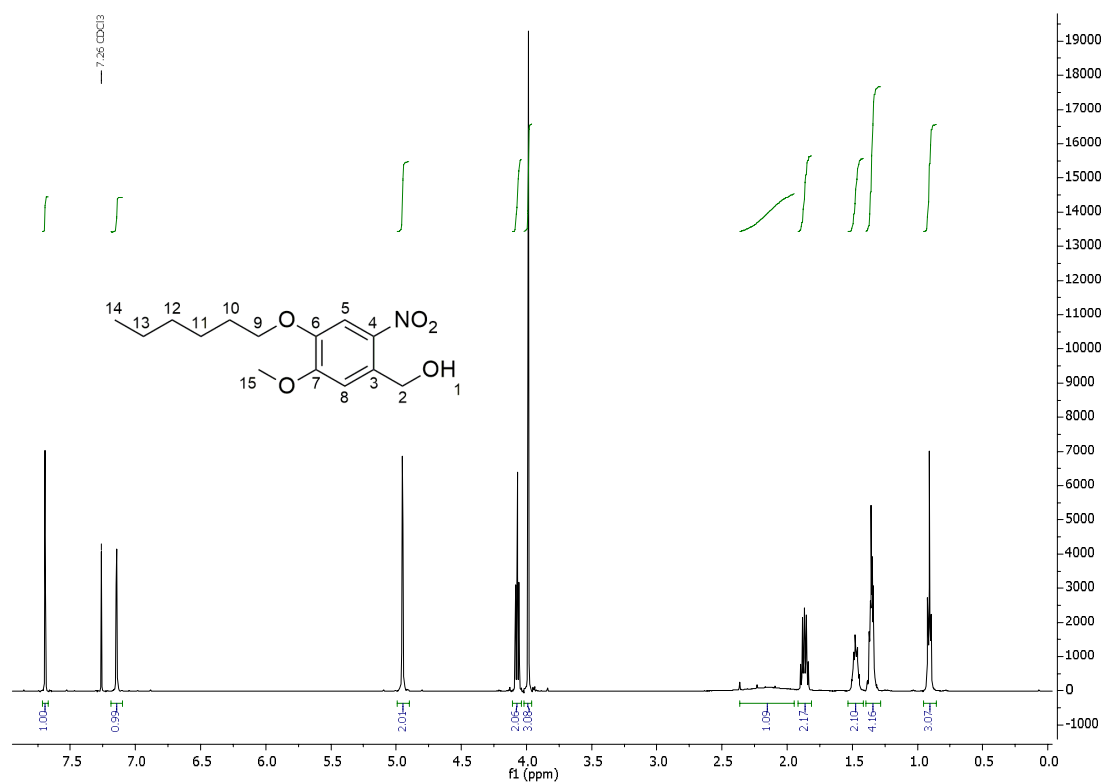

**Figure S1:** <sup>1</sup>H-NMR of 4-Hexyloxy-5-methoxy-2-nitrobenzylalcohol **8** in CDCl<sub>3</sub>.

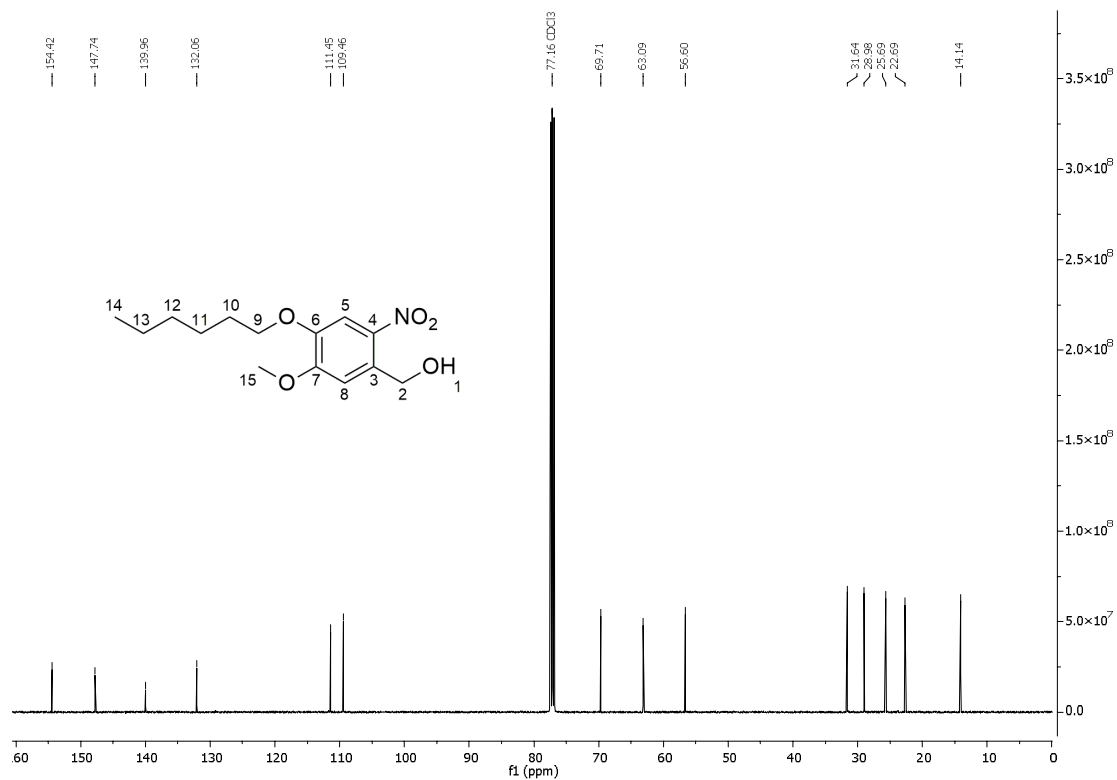

**Figure S2:** <sup>13</sup>C-NMR of 4-Hexyloxy-5-methoxy-2-nitrobenzylalcohol **8** in CDCl<sub>3</sub>.

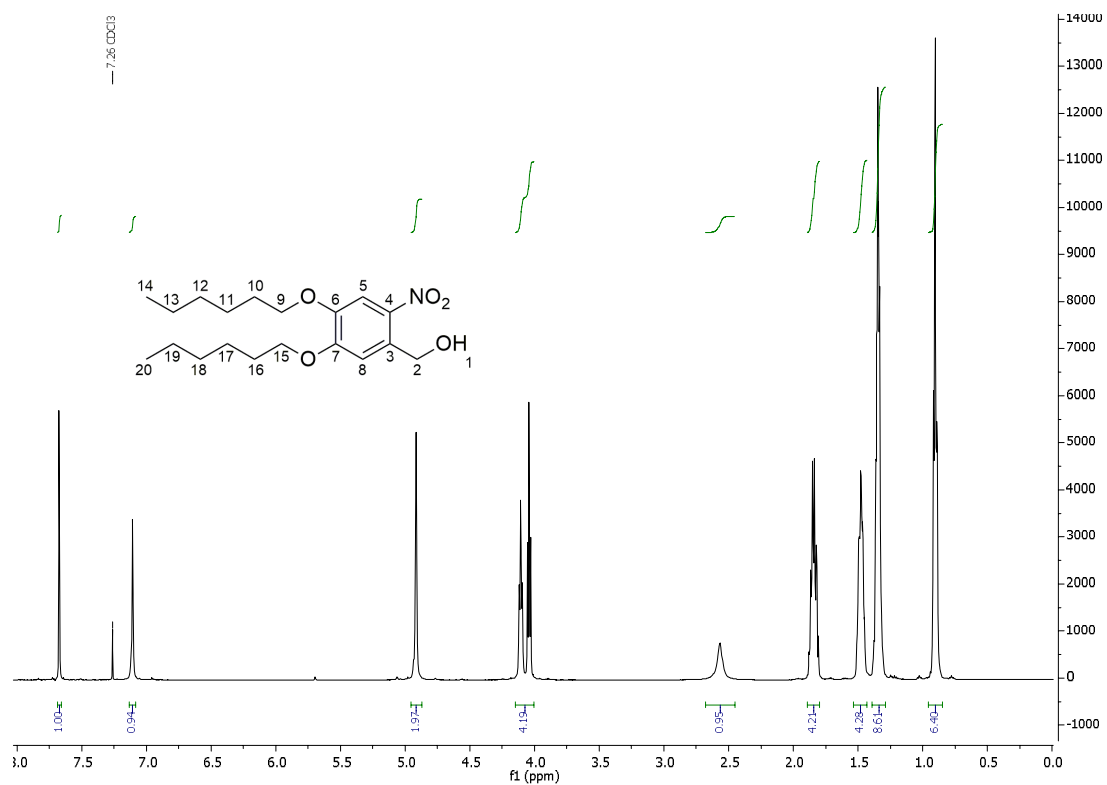

**Figure S3:** <sup>1</sup>H-NMR of 4,5-Di(hexyloxy)-2-nitrobenzylalcohol **9** in CDCl<sub>3</sub>.

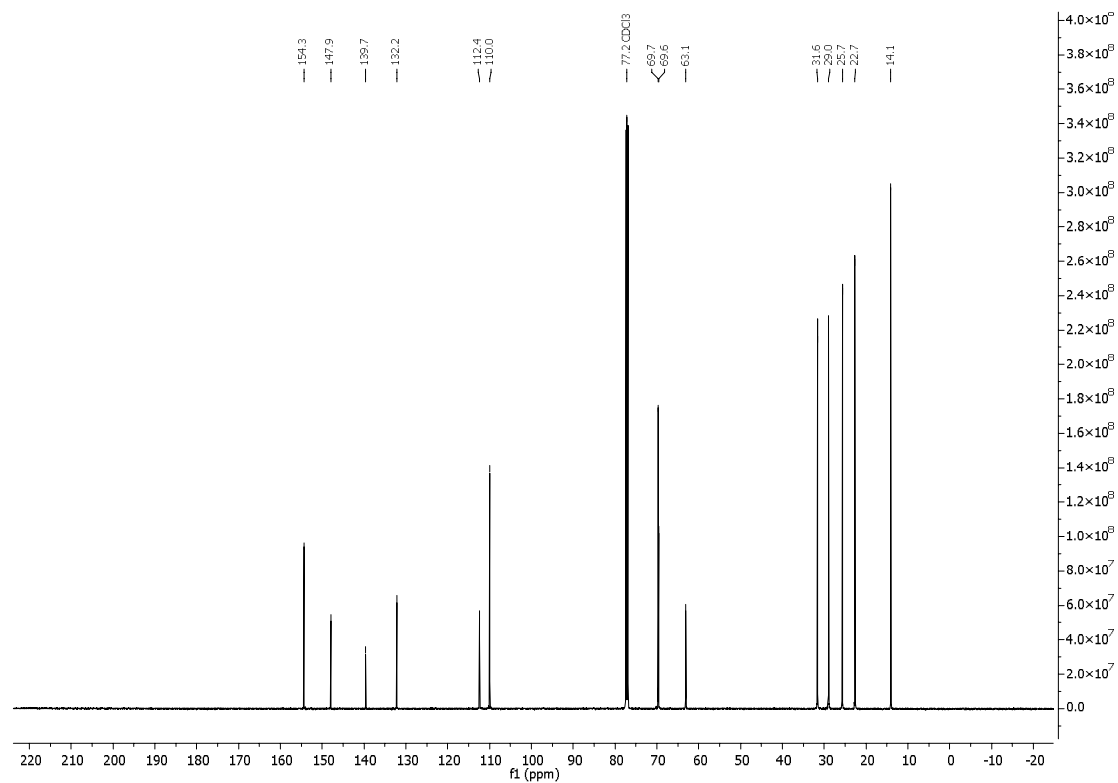

**Figure S4:** <sup>13</sup>C-NMR of 4,5-Di(hexyloxy)-2-nitrobenzylalcohol **9** in CDCl<sub>3</sub>.

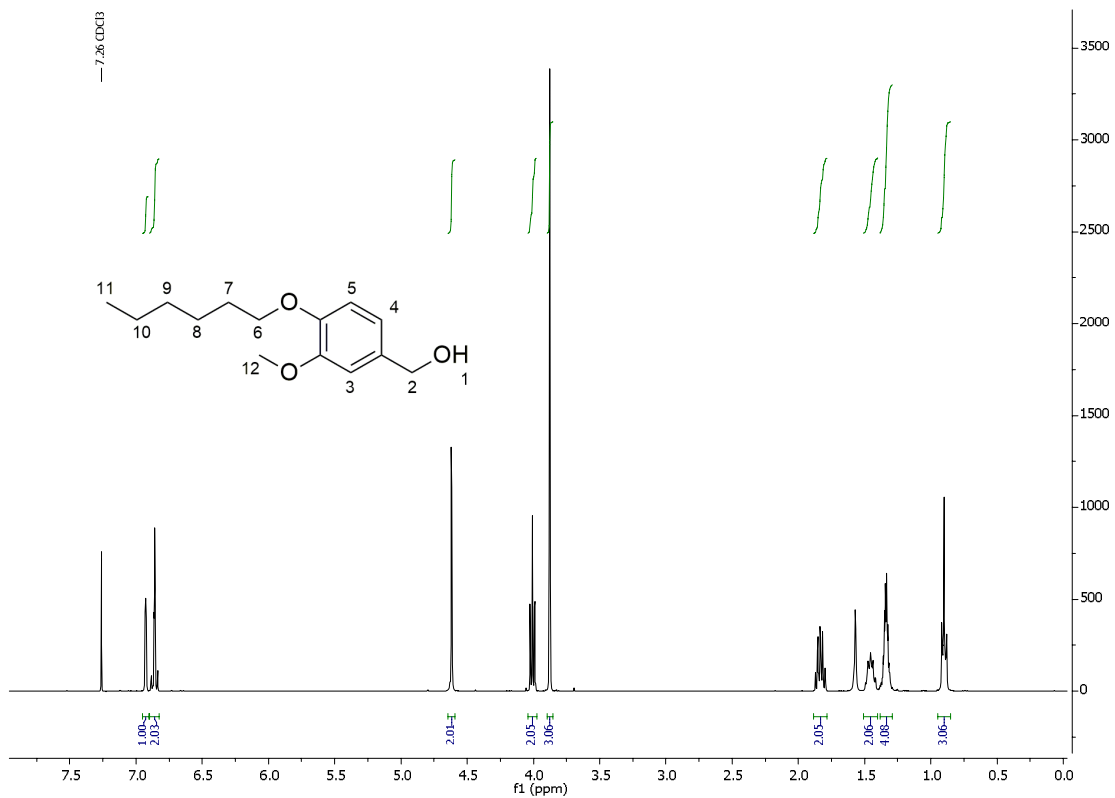

**Figure S5:** <sup>1</sup>H-NMR of 4-Hexyloxy-3-methoxybenzylalcohol **10** in CDCl<sub>3</sub>.

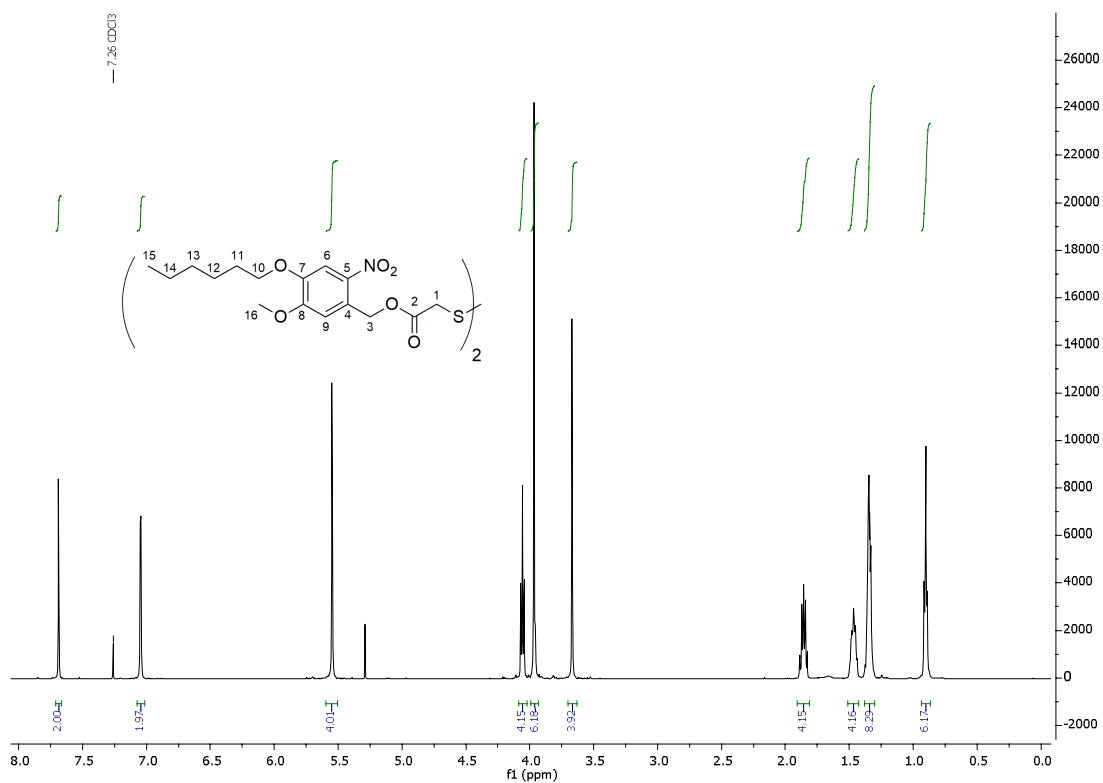

**Figure S6:**  $^1\text{H-NMR}$  of Bis-(4-hexyloxy-3-methoxy-2-nitrobenzyl)-dithioglycolate **1** in  $\text{CDCl}_3$ .

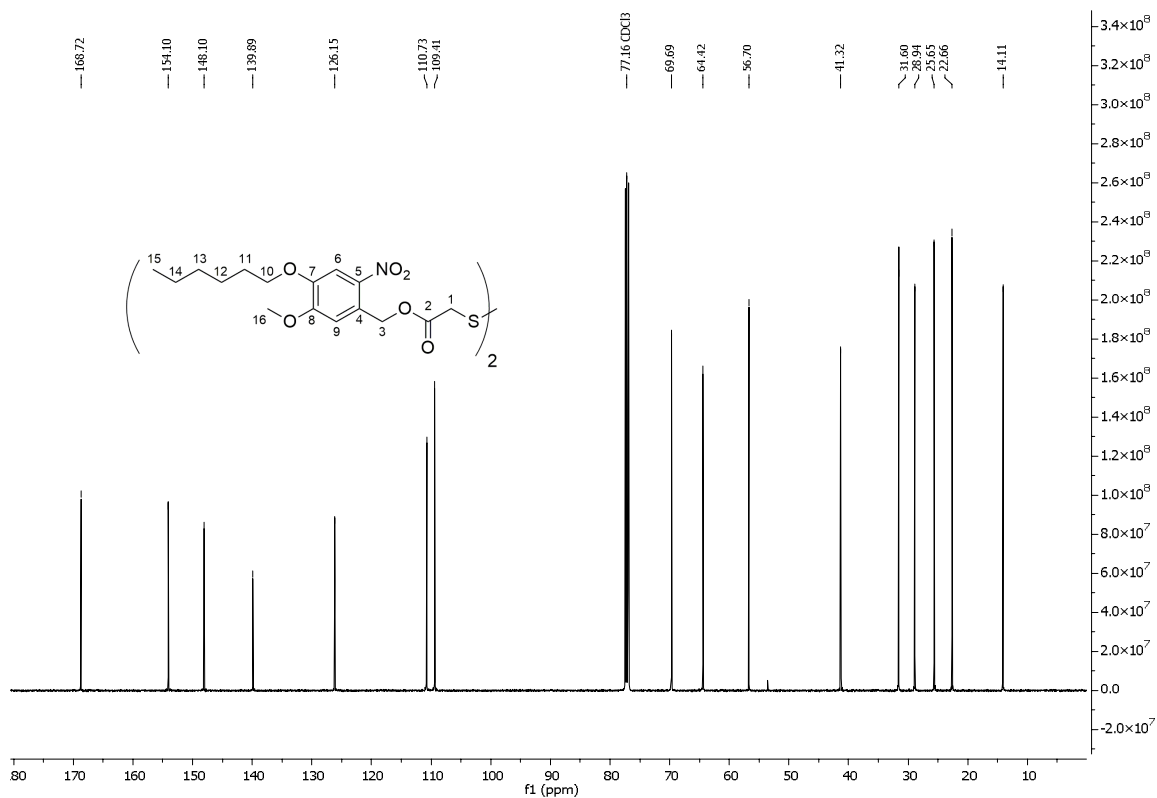

**Figure S7:**  $^{13}\text{C-NMR}$  of Bis-(4-hexyloxy-3-methoxy-2-nitrobenzyl)-dithioglycolate **1** in  $\text{CDCl}_3$ .

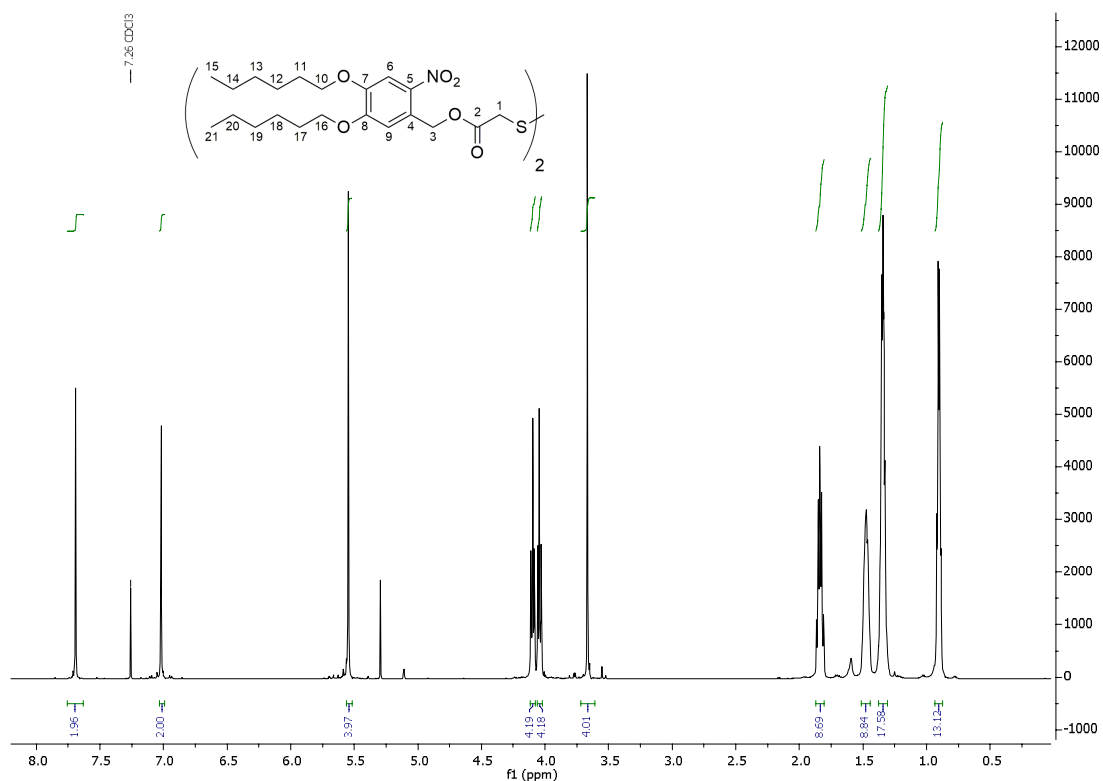

**Figure S8:**  $^1\text{H-NMR}$  of Bis-(4,5-di(hexyloxy)-2-nitrobenzyl)-dithioglycolate **2** in  $\text{CDCl}_3$ .

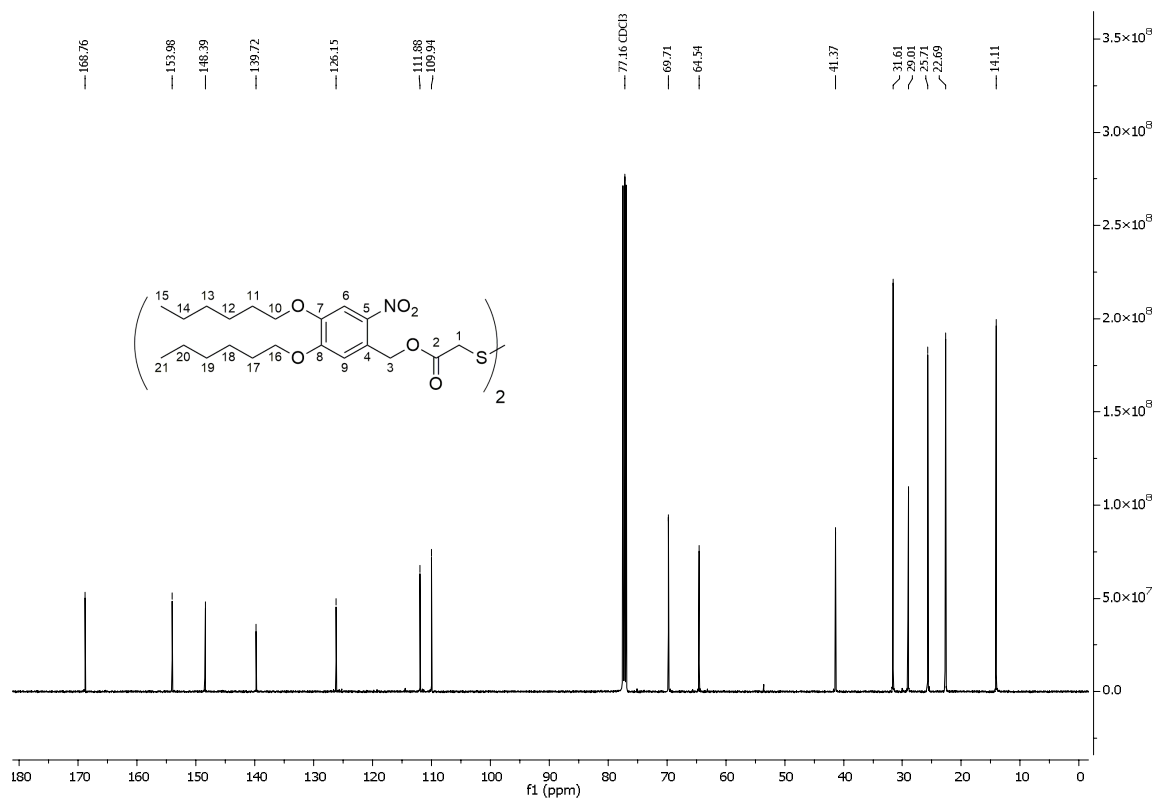

**Figure S9:**  $^{13}\text{C-NMR}$  of Bis-(4,5-di(hexyloxy)-2-nitrobenzyl)-dithioglycolate **2** in  $\text{CDCl}_3$ .

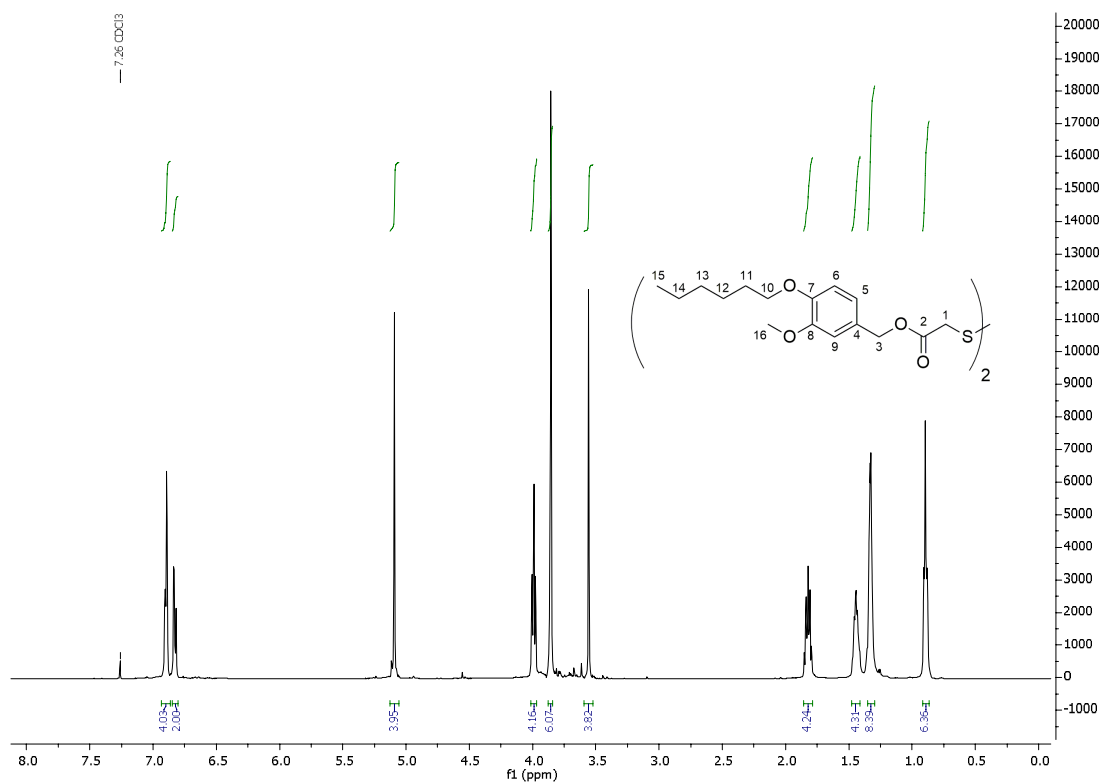

**Figure S10:** <sup>1</sup>H-NMR of Bis-(4-hexyloxy-3-methoxy-benzyl)-dithioglycolate **3** in CDCl<sub>3</sub>.

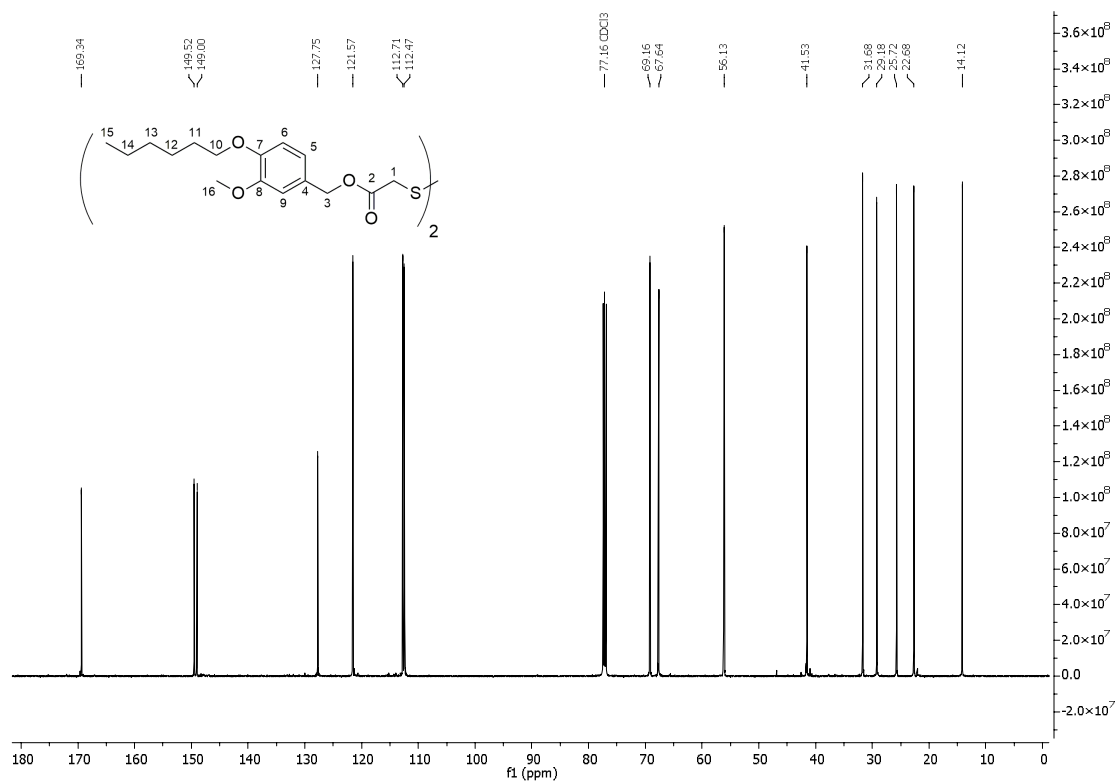

**Figure S11:** <sup>13</sup>C-NMR of Bis-(4-hexyloxy-3-methoxy-benzyl)-dithioglycolate **3** in CDCl<sub>3</sub>.



### 3. IR Data

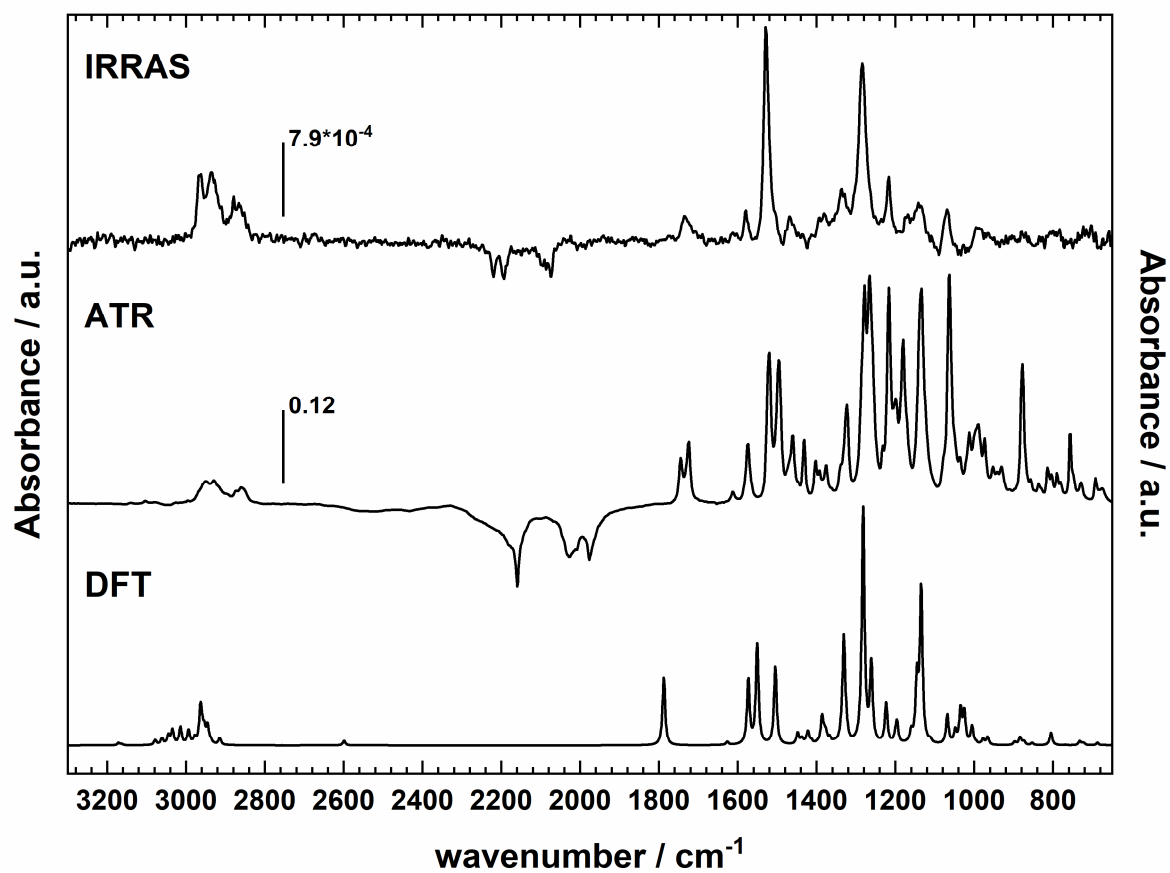

**Figure S12:** Full IR comparison for ONB-HM. ATR spectrum measured of disulfide **1**.

**Table S1:** IR band assignment of ONB-HM from DFT calculation of their vibrational modes and orientation of the transition dipole moments (TDM) according to the axis given in Figure X of the paper.  $\nu$  stretching vibration,  $\Delta$  in-plane deformation vibration,  $\gamma$  wagging vibration,  $\omega$  aromatic out-of-plane vibration,  $\rho$  rocking vibration and  $\tau$  twisting vibration.

| No. | Mode                                  | IRRAS<br>[cm <sup>-1</sup> ] | ATR<br>[cm <sup>-1</sup> ] | DFT<br>[cm <sup>-1</sup> ] | TDM                  | weakening    |
|-----|---------------------------------------|------------------------------|----------------------------|----------------------------|----------------------|--------------|
| 1   | $\nu_{CH_2,as.}$                      | 2935                         | 2929                       | 3014                       | -                    | -            |
| 2   | $\nu_{CO}$                            | 1736                         | 1735                       | 1788                       | $\perp$ - axis A     | Y            |
| 3   | $\nu_{CC, arom.} + \Delta_{CH}$       | 1614                         | 1612                       | 1626                       | /                    | -            |
| 4   | $\nu_{as, NO_2}$ anti-phase           | 1581                         | 1575                       | 1573                       | $\parallel$ - axis A | Y            |
| 5   | $\nu_{CC, arom.} + \nu_{as, NO_2}$    | 1528                         | 1519                       | 1551                       | $\parallel$ - axis B | -            |
| 6   | $\nu_{CC, arom.} + \Delta_{CH}$       | -                            | 1496                       | 1505                       | $\parallel$ - axis B | Y            |
| 7   | $\nu_{s, NO_2}$                       | 1335                         | 1324                       | 1331                       | $\perp$ - axis B     | Y            |
| 8   | $\nu_{CO, arom.} + \nu_{CO, carboxy}$ | 1285                         | 1279                       | 1282                       | $\perp$ - axis B     | Y            |
| 9   | $\gamma_{CH_2}$ (glycolate)           | -                            | 1226                       | 1261                       | $\perp$ - axis B     | extinguished |
| 10  | $\nu_{CO, arom.}$ anti-phase          | 1220                         | 1217                       | 1224                       | between axis A and B | -            |
| 11  | $\Delta_{CH, arom.}$                  | 1185                         | 1181                       | 1196                       | $\parallel$ - axis B | Y            |
| 12  | $\gamma_{CH_2} + \rho_{CH_3}$         | 1138                         | 1134                       | 1135                       | $\parallel$ - axis B | Y            |
| 13  | $\gamma_{CN, arom.}$                  | 1070                         | 1064                       | 1068                       | $\perp$ - axis B     | Y            |
| 14  | $\omega_{CH, arom.}$                  | -                            | 877                        | 884                        | out-of-plane         | extinguished |

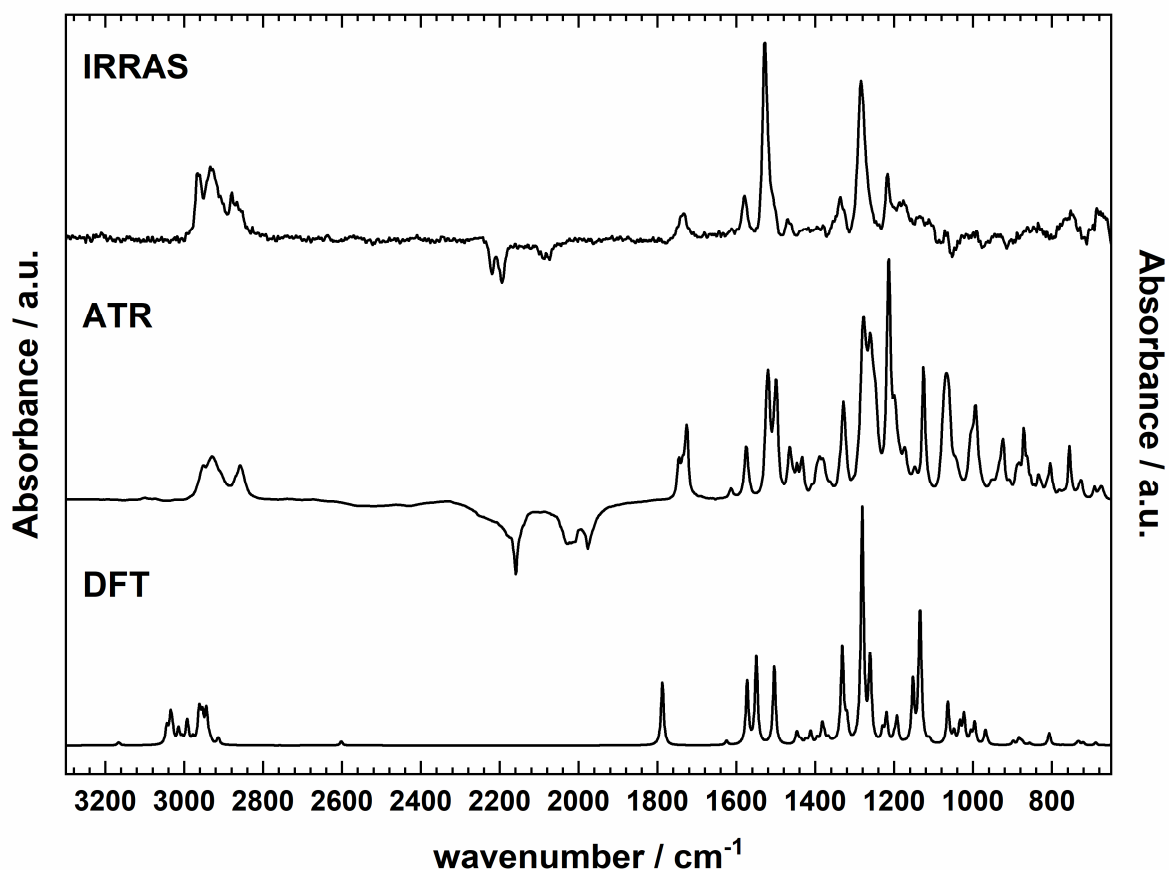

**Figure S13:** Full IR comparison for ONB-HH. ATR spectrum measured of disulfide **2**.

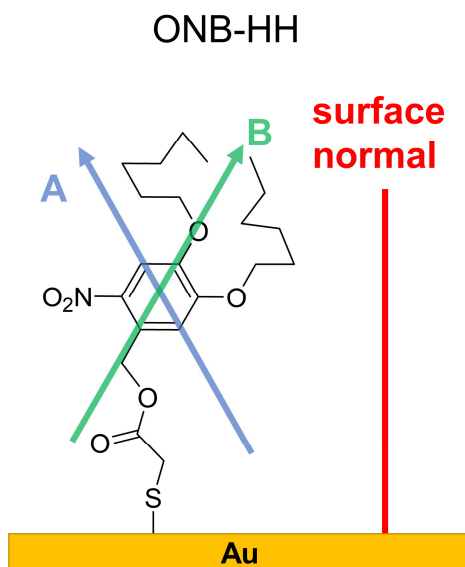

**Figure S14:** Surface configuration of the ONB-HH molecules in the SAM as depicted by the IR analysis. The shown axis A, along the center of the aromatic ring, and B through the benzyl-CH<sub>2</sub>-group and hexoxy-oxygen, serve as an orientation for the TDMs shown in the IR analysis.

**Table S2:** IR band assignment of ONB-HH from DFT calculation of their vibrational modes and orientation of the transition dipole moments (TDM) according to the axis given in Figure S14.  $\nu$  stretching vibration,  $\Delta$  in-plane deformation vibration,  $\gamma$  wagging vibration,  $\omega$  aromatic out-of-plane vibration,  $\rho$  rocking vibration and  $\tau$  twisting vibration.

| No. | Mode                                  | IRRAS<br>[cm <sup>-1</sup> ] | ATR<br>[cm <sup>-1</sup> ] | DFT<br>[cm <sup>-1</sup> ] | TDM                  | weakening    |
|-----|---------------------------------------|------------------------------|----------------------------|----------------------------|----------------------|--------------|
| 1   | $\nu_{CH_2,as.}$                      | 2933                         | 2929                       | 3014                       | -                    | -            |
| 2   | $\nu_{CO}$                            | 1733                         | 1734                       | 1788                       | $\perp$ - axis A     | Y            |
| 3   | $\nu_{CC, arom.} + \Delta_{CH}$       | 1612                         | 1614                       | 1625                       | $\perp$ - axis B     | Y            |
| 4   | $\nu_{as, NO_2}$ anti-phase           | 1579                         | 1575                       | 1573                       | $\parallel$ - axis A | Y            |
| 5   | $\nu_{CC, arom.} + \nu_{as, NO_2}$    | 1527                         | 1519                       | 1549                       | $\parallel$ - axis B | -            |
| 6   | $\nu_{CC, arom.} + \Delta_{CH}$       | 1506                         | 1500                       | 1504                       | $\perp$ - axis A     | Y            |
| 7   | $\nu_{s, NO_2}$                       | 1336                         | 1327                       | 1332                       | $\perp$ - axis B     | Y            |
| 8   | $\nu_{CO, arom.} + \nu_{CO, carboxy}$ | 1284                         | 1275                       | 1281                       | $\perp$ - axis A     | Y            |
| 9   | $\nu_{CO, arom.}$ anti-phase          | 1216                         | 1215                       | 1220                       | $\parallel$ - axis A | Y            |
| 10  | $\nu_{CO, arom.}$                     | 1176                         | 1174                       | 1193                       | $\perp$ - axis B     | Y            |
| 11  | $\gamma_{CH_2}$                       | 1147                         | 1144                       | 1152                       | $\parallel$ - axis B | -            |
| 12  | $\tau_{CH_2} + \rho_{CH_3}$           | 1135                         | 1126                       | 1134                       | $\parallel$ - axis B | Y            |
| 13  | $\gamma_{CN, arom.}$                  | -                            | 1062                       | 1064                       | $\perp$ - axis B     | extinguished |
| 14  | $\omega_{CH, arom.}$                  | -                            | 870                        | 884                        | out-of-plane         | extinguished |

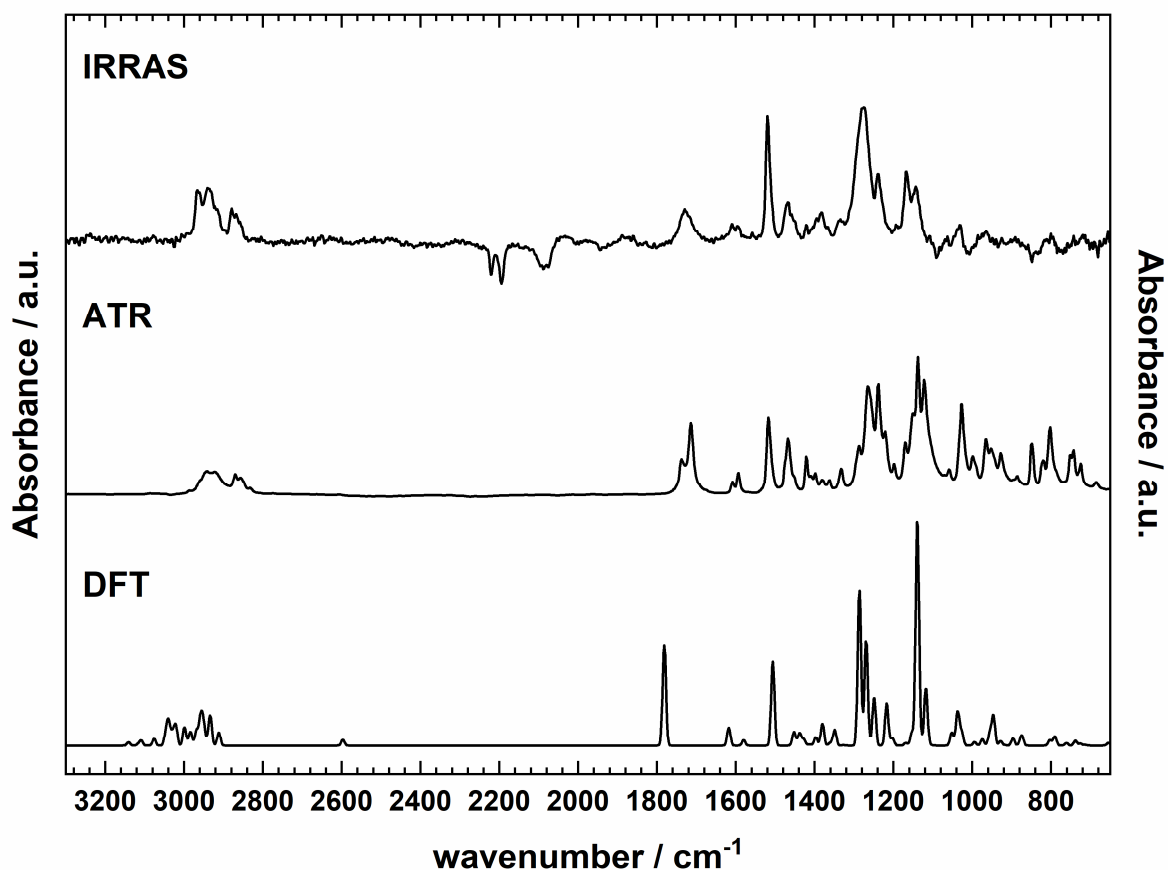

**Figure S15:** Full IR comparison for B-MH. ATR spectrum measured of disulfide **3**.

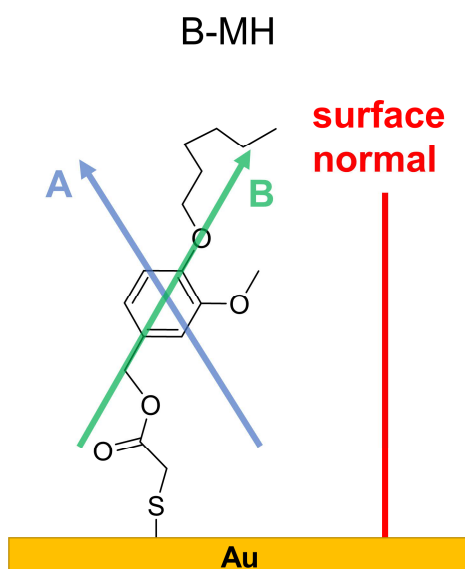

**Figure S16:** Surface configuration of the B-MH molecules in the SAM as depicted by the IR analysis. The shown axis A, along the center of the aromatic ring, and B through the benzyl-CH<sub>2</sub>-group and hexoxy-oxygen, serve as an orientation for the TDMs shown in the IR analysis.

**Table S3:** IR band assignment of B-MH from DFT calculation of their vibrational modes and orientation of the transition dipole moments (TDM) according to the axis given in Figure S16.  $\nu$  stretching vibration,  $\Delta$  in-plane deformation vibration,  $\gamma$  wagging vibration,  $\omega$  aromatic out-of-plane vibration,  $\rho$  rocking vibration and  $\tau$  twisting vibration.

| No. | Mode                                       | IRRAS<br>[cm <sup>-1</sup> ] | ATR<br>[cm <sup>-1</sup> ] | DFT<br>[cm <sup>-1</sup> ] | TDM                      | weakening    |
|-----|--------------------------------------------|------------------------------|----------------------------|----------------------------|--------------------------|--------------|
| 1   | $\nu_{CH_2,as.}$                           | 2933                         | 2929                       | 3014                       | -                        | -            |
| 2   | $\nu_{CO}$                                 | 1729                         | 1737                       | 1775                       | $\perp$ - axis A         | Y            |
| 3   | $\nu_{CC, arom.} + \Delta_{CH}$            | 1594                         | 1593                       | 1581                       | $\parallel$ - axis B     | Y            |
| 4   | $\nu_{CC, arom.} + \Delta_{CH}$            | 1519                         | 1517                       | 1507                       | $\parallel$ - axis A     | Y            |
| 5   | $\nu_{CO, arom.}$ in-phase + $\Delta_{CH}$ | 1467                         | 1467                       | 1448                       | $\parallel$ - axis B     | Y            |
| 6   | $\nu_{CC, arom.} + \Delta_{CH}$            | 1382                         | 1380                       | 1380                       | $\parallel$ - axis A     | -            |
| 7   | $\gamma_{CH_2}$                            | 1334                         | 1332                       | 1347                       | between axis A and B     | -            |
| 8   | $\nu_{CO, arom.} + \nu_{CO, carboxy}$      | 1274                         | 1265                       | 1268                       | $\perp$ - axis A         | Y            |
| 9   | $\nu_{CO, arom.}$ anti-phase               | 1240                         | 1238                       | 1250                       | $\parallel$ - axis A     | Y            |
| 10  | $\tau_{CH_2}$                              | 1193                         | 1198                       | 1218                       | $\perp$ - axis B         | extinguished |
| 11  | $\gamma_{CH_2} + \rho_{CH_3}$              | 1166                         | 1137                       | 1153                       | $\perp$ - axis A         | Y            |
| 12  | $\rho_{CH_2}$                              | 1143                         | 1122                       | 1138                       | $\parallel$ - axis B     | Y            |
| 13  | $\Delta_{CH_2}$                            | 1031                         | 1027                       | 1034                       | $\parallel$ - axis B     | Y            |
| 14  | $\tau_{CH_2}$                              | -                            | 849                        | 872                        | $\perp$ - surface normal | extinguished |
| 15  | $\omega_{CH, arom.}$                       | -                            | 802                        | 792                        | out-of-plane             | extinguished |

#### 4. Wettability images

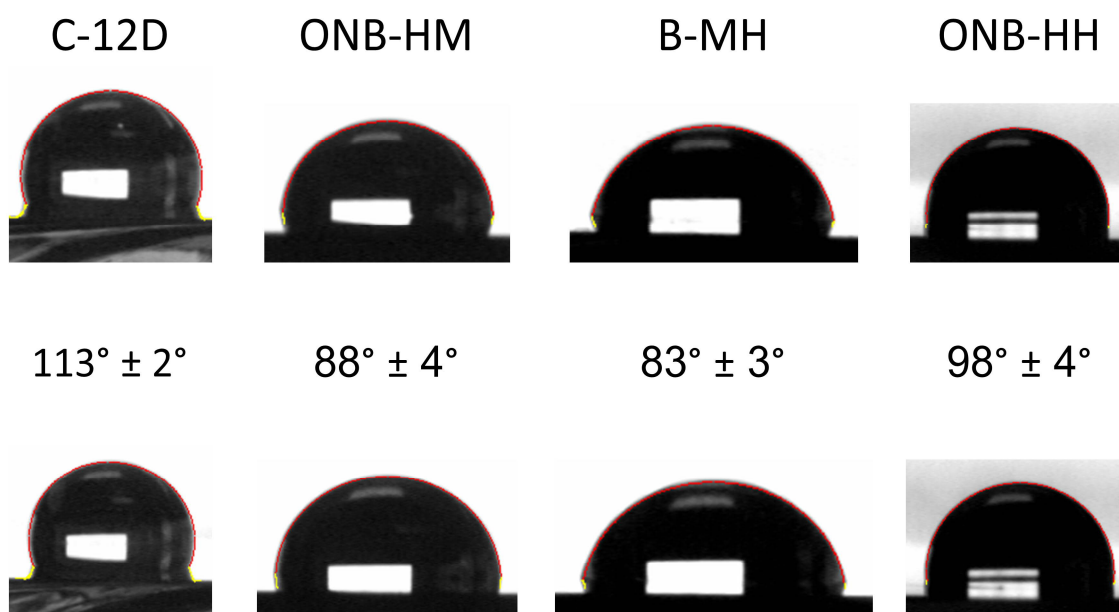

**Figure S17:** WCA images of the three tested SAMs ONB-HM, ONB-HH and B-MH and C12-D as reference, together with the measured WCAs.

## 5. LED-Datasheet

**Table S4:** Data sheet of the used 5W High Power 365nm LED.

| Item Type               | LED Bulb              |
|-------------------------|-----------------------|
| LED Chip Brand          | 2 x Epiled 45mil Chip |
| LED Chip Model          | 2 x 3W High Power     |
| Base Type               | 2 Pins                |
| Diameter Bulb           | 5mm                   |
| Diameter Package        | 8mm                   |
| Viewing Angle           | 140°                  |
| Dominant Wavelength     | 365-370nm             |
| Emitting Color          | UV                    |
| Luminous Intensity(max) | 17.589 lm             |
| DC Forward Voltage      | 3.4V-3.8V             |
| DC Forward Current      | 1400mA                |
| Max. Power Dissipation  | 5320mW                |
| Max. Reverse Voltage    | 5V                    |

## 8. REFERENCE

- (1) Rocha-Ortiz, J. S.; Insuasty, A.; Insuasty, B.; Ortiz, A. Evaluating the Intramolecular Charge Transfer in Novel Meso-Alkoxyphenyl and  $\beta$ -Ethynylphenolic BODIPY Derivatives. *J. Mol. Struct.* **2020**, *1206*, 127774. <https://doi.org/10.1016/j.molstruc.2020.127774>.
- (2) Zhang, Q.; Peng, H.; Zhang, G.; Lu, Q.; Chang, J.; Dong, Y.; Shi, X.; Wei, J. Facile Bottom-Up Synthesis of Coronene-Based 3-Fold Symmetrical and Highly Substituted Nanographenes from Simple Aromatics. *J. Am. Chem. Soc.* **2014**, *136* (13), 5057–5064. <https://doi.org/10.1021/ja413018f>.
- (3) Fuser, Matthias. Dissertation: Darstellung Funktionalisierter SAM-Präkursoren Und MOF-Linker Für Den Aufbau von Strukturierten Organischen Dünnschichtsystemen, Goethe Universität Frankfurt am Main, Frankfurt am Main, 2018.
